# Supplementary material
Source: publisher figshare collection journal article supplement (https://tandf.figshare.com/articles/dataset/_/23709767)
Supplement: Supplementary file 1 [file 1]

# SUPPLEMENTARY MATERIAL

*Ostrich*, 2023

<https://doi.org/10.2989/00306525.2023.2222230>

## Assessment of genetic and morphological differentiation among populations of the Diederik Cuckoo *Chrysococcyx caprius*

Rae M Smith, Desiré L Dalton, Monica Mwale, Lisa Jane Nupen, Chantelle Pretorius, Jamie Bojko,  
Kim Labuschagne, Isa-Rita M Russo and Samuel T Osinubi

**Supplementary Table S1:** Pairwise genetic distances between members of the genera *Chrysococcyx*, *Coccyzus* and *Cuculus* estimated from the mitochondrial ribosomal RNA subunit 12S

|                                           | 1     | 2     | 3     | 4     | 5     | 6     |
|-------------------------------------------|-------|-------|-------|-------|-------|-------|
| [1] <i>Chrysococcyx caprius</i> (Clade 1) |       |       |       |       |       |       |
| [2] <i>Chrysococcyx caprius</i> (Clade 2) | 0.004 |       |       |       |       |       |
| [3] <i>Chrysococcyx caprius</i>           | N/A   | N/A   |       |       |       |       |
| [4] <i>Chrysococcyx klaas</i>             | 0.026 | 0.027 | 0.029 |       |       |       |
| [5] <i>Coccyzus erythrophthalmus</i>      | 0.037 | 0.036 | 0.041 | 0.054 |       |       |
| [6] <i>Cuculus canorus canorus</i>        | 0.041 | 0.041 | 0.046 | 0.056 | 0.008 |       |
| [7] <i>Cuculus solitarius</i>             | 0.039 | 0.042 | 0.044 | 0.056 | 0.011 | 0.003 |

**Supplementary Table S2:** Pairwise genetic distances between members of the genera *Chrysococcyx* and *Cuculus* estimated from the mitochondrial ribosomal RNA subunit 16S

|                                           | 1     | 2     | 3     | 4     | 5     | 6     | 7     | 8     |
|-------------------------------------------|-------|-------|-------|-------|-------|-------|-------|-------|
| [1] <i>Chrysococcyx caprius</i> (Clade 1) |       |       |       |       |       |       |       |       |
| [2] <i>Chrysococcyx caprius</i> (Clade 2) | 0.010 |       |       |       |       |       |       |       |
| [3] <i>Chrysococcyx caprius</i>           | N/A   | N/A   |       |       |       |       |       |       |
| [4] <i>Chrysococcyx klaas</i>             | 0.069 | 0.068 | 0.069 |       |       |       |       |       |
| [5] <i>Cuculus solitarius</i>             | 0.139 | 0.145 | 0.140 | 0.121 |       |       |       |       |
| [6] <i>Cuculus gularis</i>                | 0.143 | 0.141 | 0.143 | 0.118 | 0.018 |       |       |       |
| [7] <i>Cuculus poliocephalus</i>          | 0.144 | 0.142 | 0.144 | 0.126 | 0.036 | 0.030 |       |       |
| [8] <i>Cuculus canorus</i>                | 0.143 | 0.141 | 0.142 | 0.117 | 0.021 | 0.009 | 0.027 |       |
| [9] <i>Cuculus micropterus</i>            | 0.143 | 0.141 | 0.143 | 0.118 | 0.020 | 0.015 | 0.027 | 0.006 |

**Supplementary Table S3:** Pairwise genetic distances between members of the genera *Chrysococcyx* and *Cuculus* estimated from the nuclear intron 5 of the  $\beta$ -fibrinogen gene (FIB5)

|                                           | 1     | 2     | 3     | 4     | 5     | 6     |
|-------------------------------------------|-------|-------|-------|-------|-------|-------|
| [1] <i>Chrysococcyx caprius</i> (Clade 1) |       |       |       |       |       |       |
| [2] <i>Chrysococcyx caprius</i> (Clade 2) | 0.000 |       |       |       |       |       |
| [3] <i>Chrysococcyx caprius</i>           | N/A   | N/A   |       |       |       |       |
| [4] <i>Chrysococcyx klaas</i>             | 0.012 | 0.012 | 0.012 |       |       |       |
| [5] <i>Cuculus solitarius</i>             | 0.049 | 0.049 | 0.049 | 0.052 |       |       |
| [6] <i>Cuculus gularis</i>                | 0.055 | 0.055 | 0.055 | 0.058 | 0.012 |       |
| [7] <i>Cuculus canorus</i>                | 0.053 | 0.053 | 0.053 | 0.056 | 0.016 | 0.021 |

**Supplementary Table S4:** Pairwise genetic distances between members of the genera *Chrysococcyx* and *Cuculus* estimated from the nuclear recombination activating gene 1 (RAG1)

|                                           | 1     | 2     | 3     | 4     | 5     |
|-------------------------------------------|-------|-------|-------|-------|-------|
| [1] <i>Chrysococcyx caprius</i> (Clade 1) |       |       |       |       |       |
| [2] <i>Chrysococcyx caprius</i> (Clade 2) | 0.000 |       |       |       |       |
| [3] <i>Chrysococcyx caprius</i>           | N/A   | N/A   |       |       |       |
| [4] <i>Chrysococcyx klaas</i>             | 0.018 | 0.018 | 0.018 |       |       |
| [5] <i>Cuculus solitarius</i>             | 0.029 | 0.029 | 0.029 | 0.018 |       |
| [6] <i>Cuculus canorus</i>                | 0.032 | 0.032 | 0.032 | 0.040 | 0.004 |

**Supplementary Figure S1:** (a) Maximum-likelihood tree of the Diederik Cuckoo *Chrysococcyx caprius* dataset based on the mitochondrial ribosomal RNA subunit 16S under the Kimura 2-parameter (K2) + gamma (G) model; numbers below branches indicate bootstrap values. (b) Maximum-likelihood tree indicating distribution of haplotypes and (c) median-joining network

**Supplementary Figure S2:** (a) Maximum-likelihood phylogenetic tree of the Diederik Cuckoo *Chrysococcyx caprius* dataset based on the mitochondrial ribosomal RNA subunit 12S under the Kimura 2-parameter (K2) model; numbers below branches indicate bootstrap values. (b) Maximum-likelihood tree indicating distribution of haplotypes and (c) median-joining network

**Supplementary Figure S3:** Mismatch distribution for the Diederik Cuckoo *Chrysococcyx caprius* dataset showing observed and expected pairwise difference frequencies for concatenated datasets of (a) mitochondrial and (b) nuclear markers

**Supplementary Figure S4:** (a) Maximum-likelihood tree of the Diederik Cuckoo *Chrysococcyx caprius* dataset based on the nuclear intron 5 of the  $\beta$ -fibrinogen gene (FIB5), and the respective (b) median-joining network

**Supplementary Figure S5:** (a) Maximum likelihood tree of the Diederik Cuckoo *Chrysococcyx caprius* dataset based on the nuclear recombination activating gene 1 (RAG1) and the respective (b) median-joining network

**Supplementary Figure S6:** Principal component analysis (PCA) scatter plots based on the morphological measurements of Diederik Cuckoos *Chrysococcyx caprius* across Africa, in relation to sex, locality, and phylogenetic lineage (Clade 1 or Clade 2)
