# Supplementary material
Source: publisher figshare collection journal article supplement (https://tandf.figshare.com/articles/dataset/_/23709767)

A.

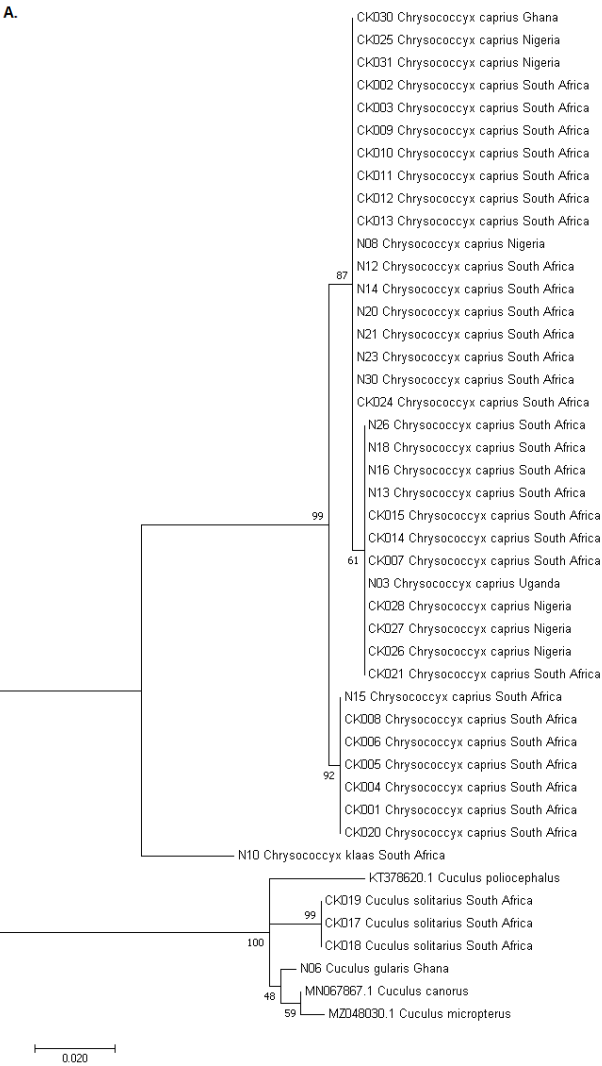

B.

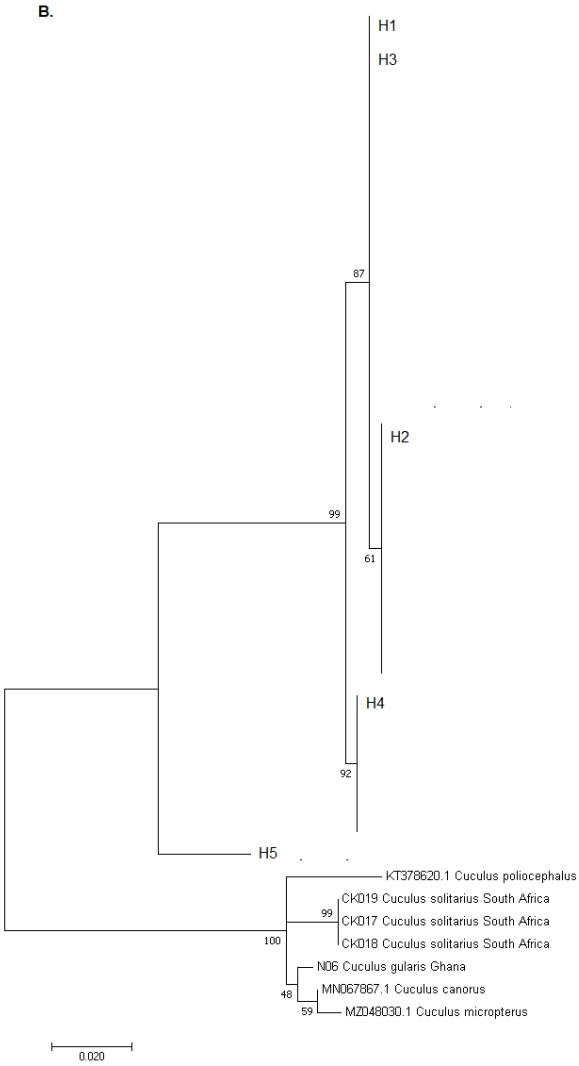

C.

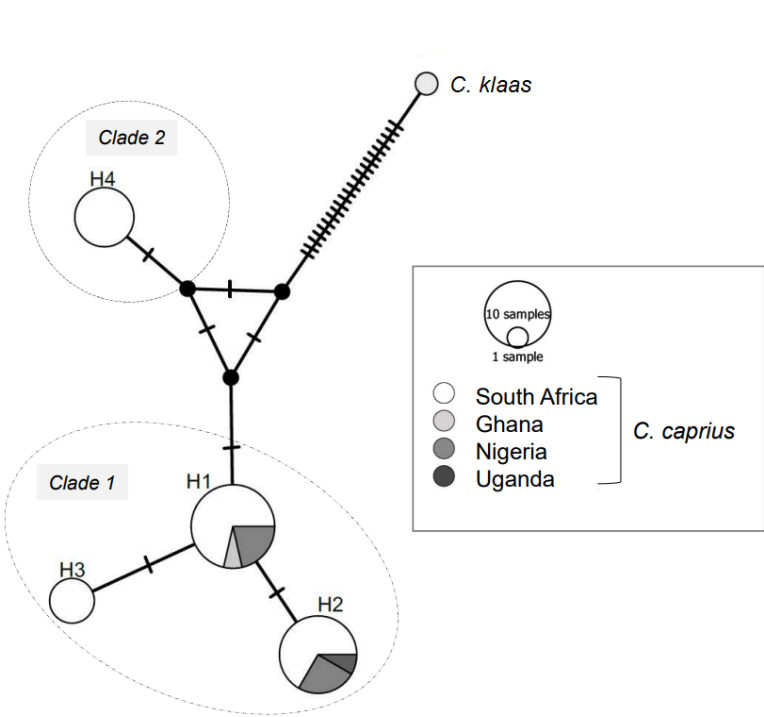

Supplement: Supplementary file 2 [file 1]

A.

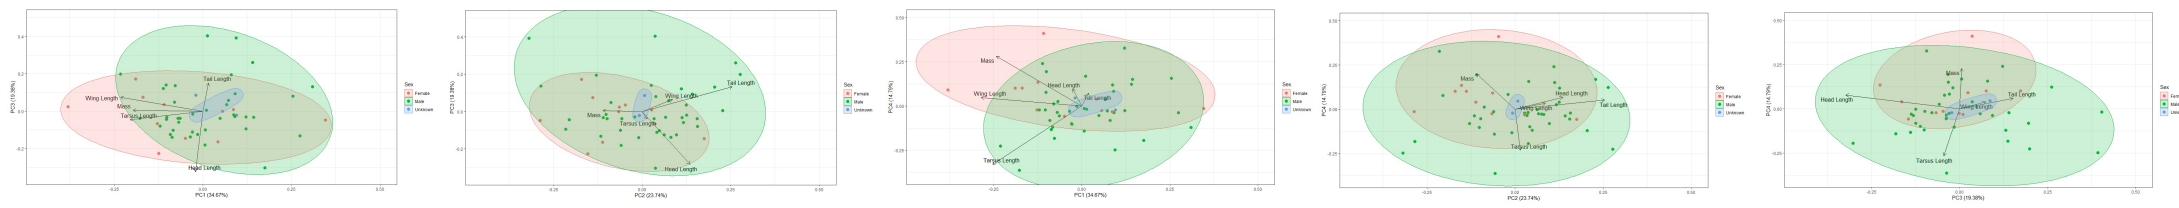

B.

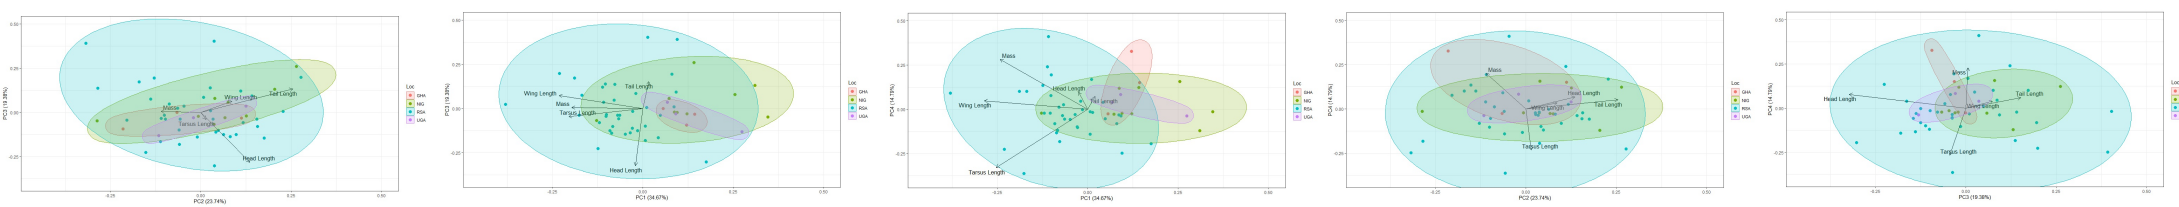

C.

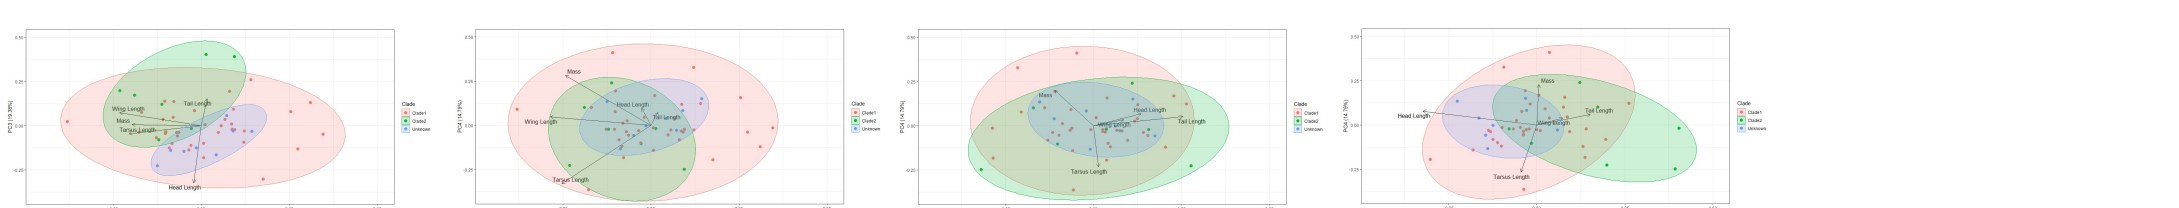

Supplement: Supplementary file 3 [file 1]

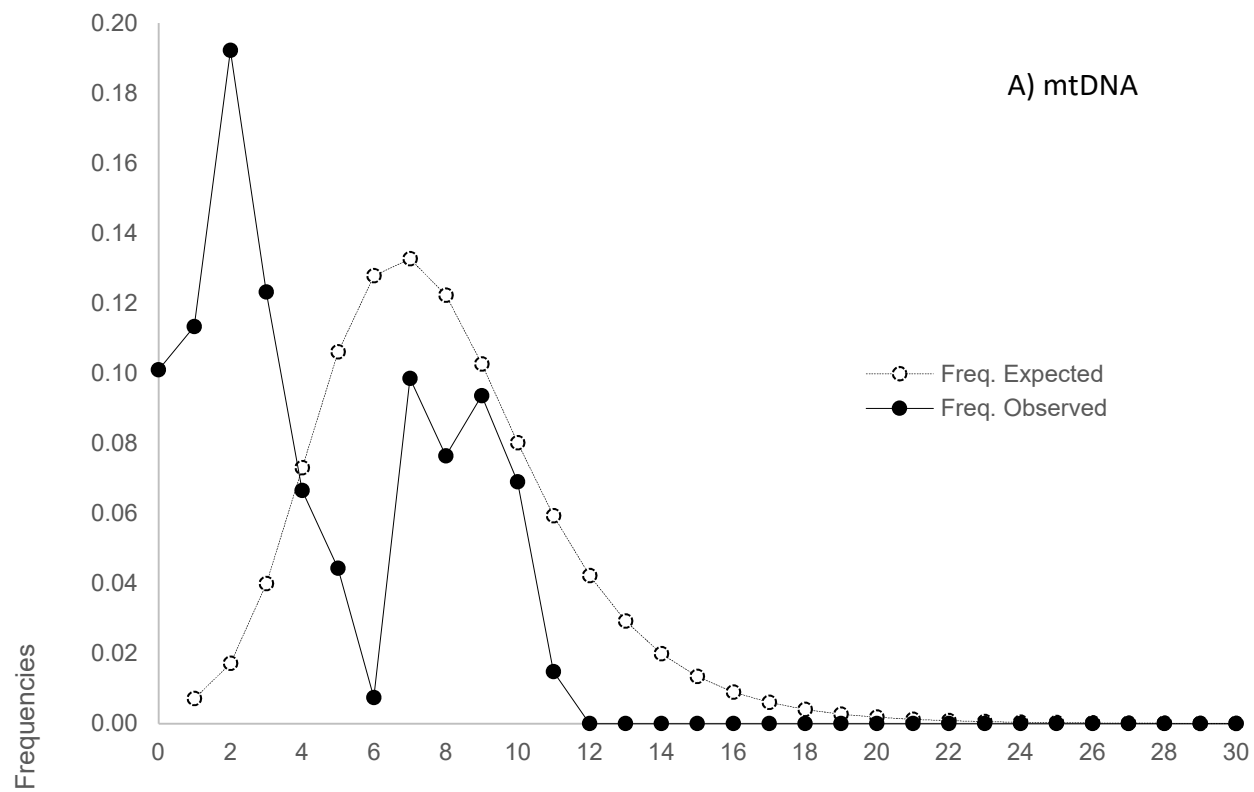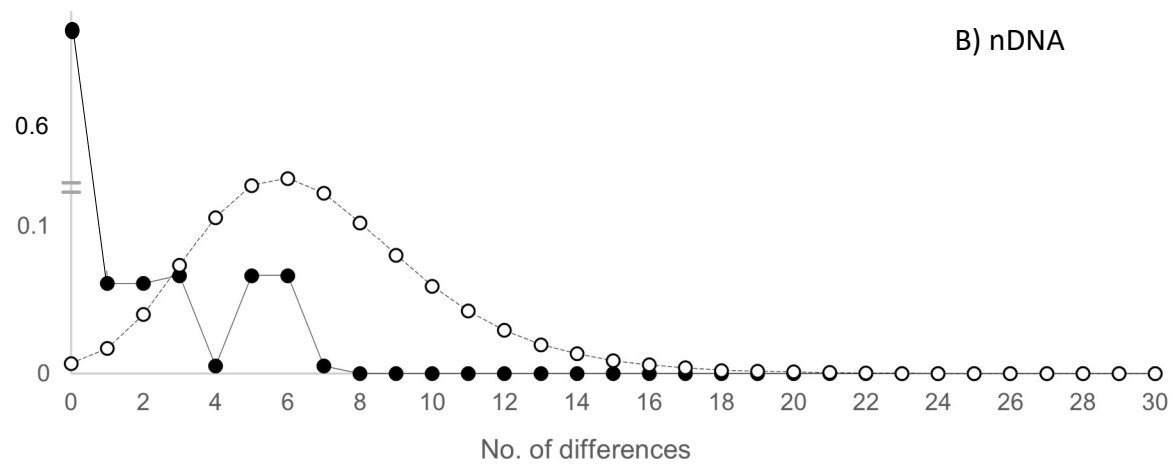

Supplement: Supplementary file 4 [file 1]

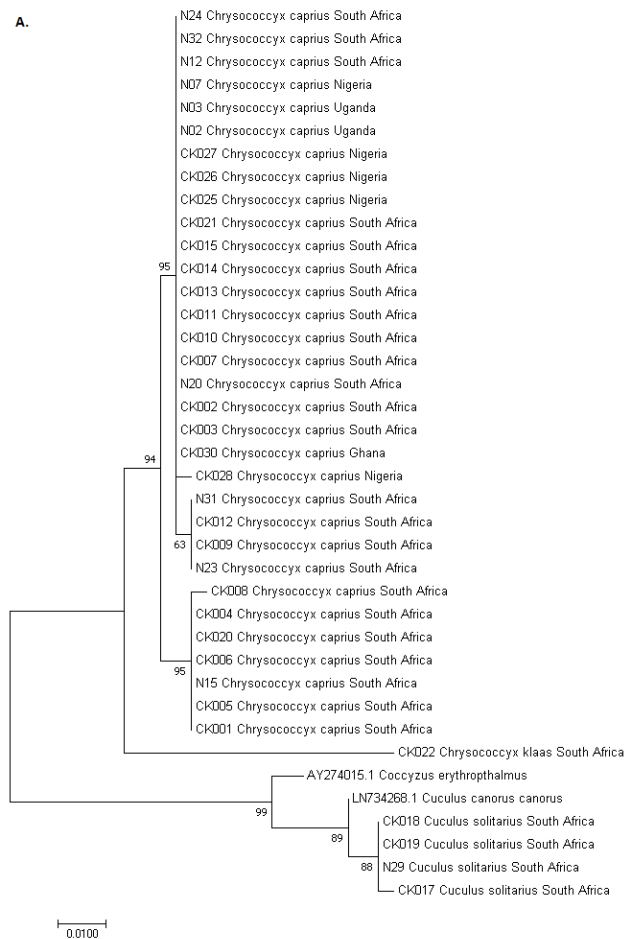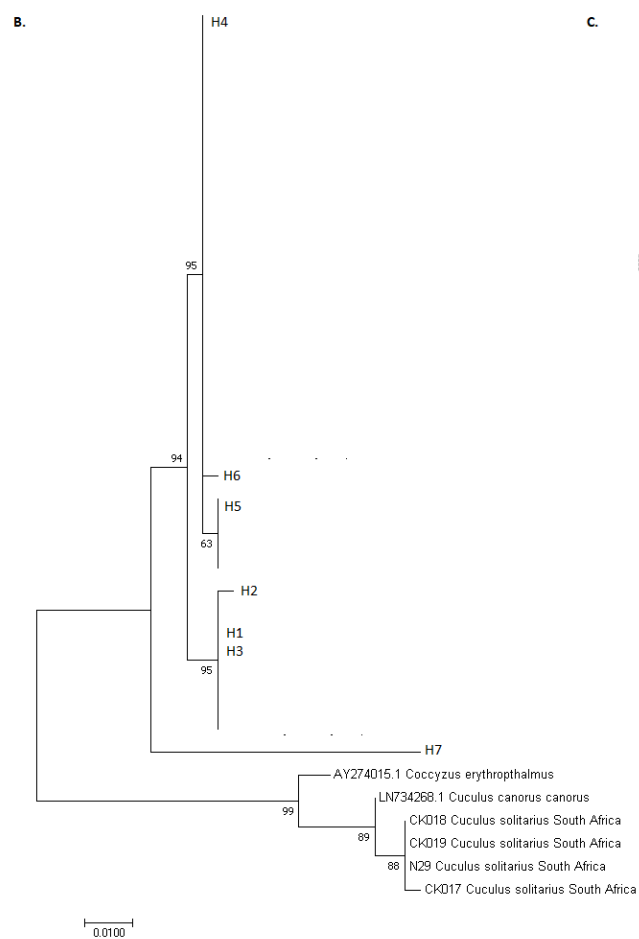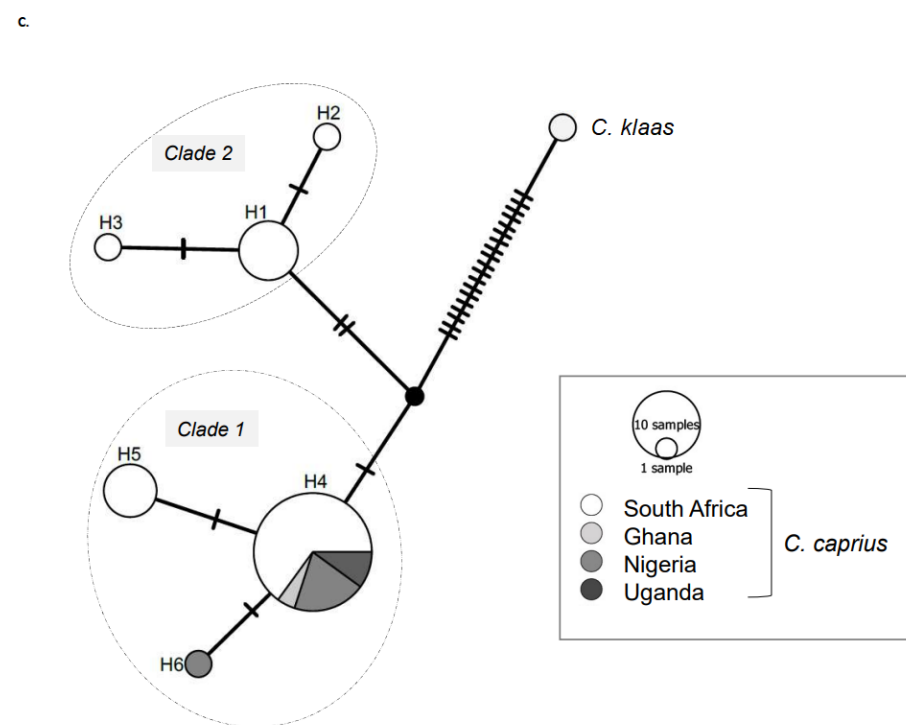

Supplement: Supplementary file 5 [file 1]

A.

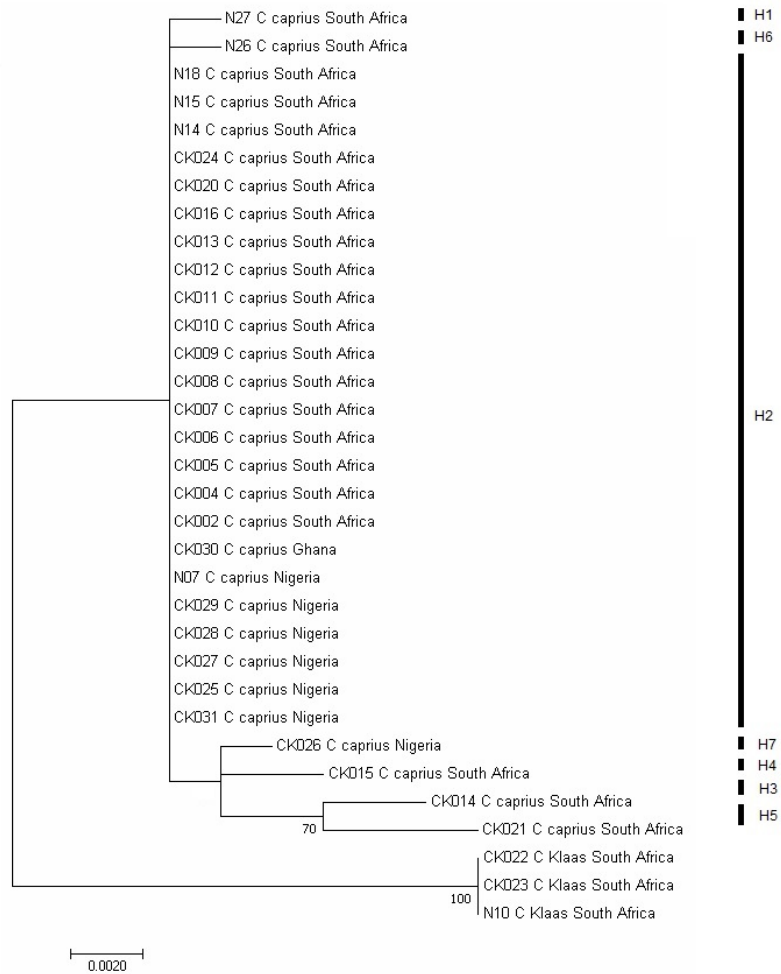

B.

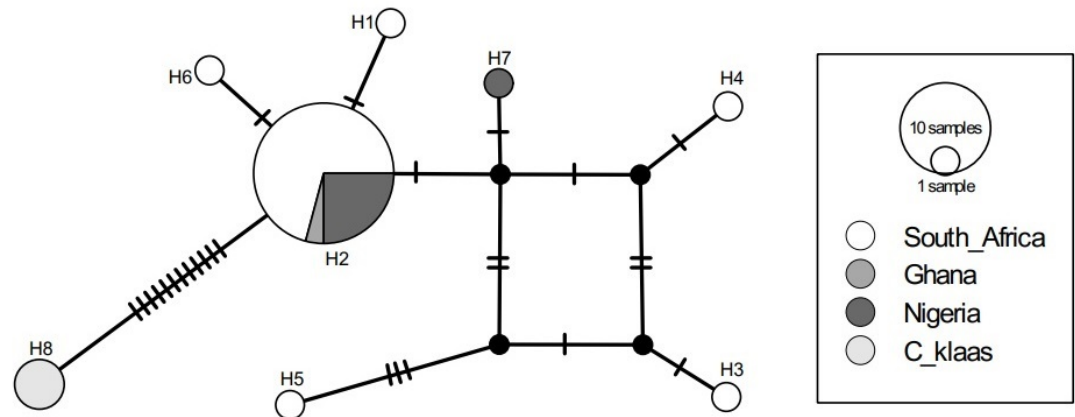

Supplement: Supplementary file 6 [file 1]

A.

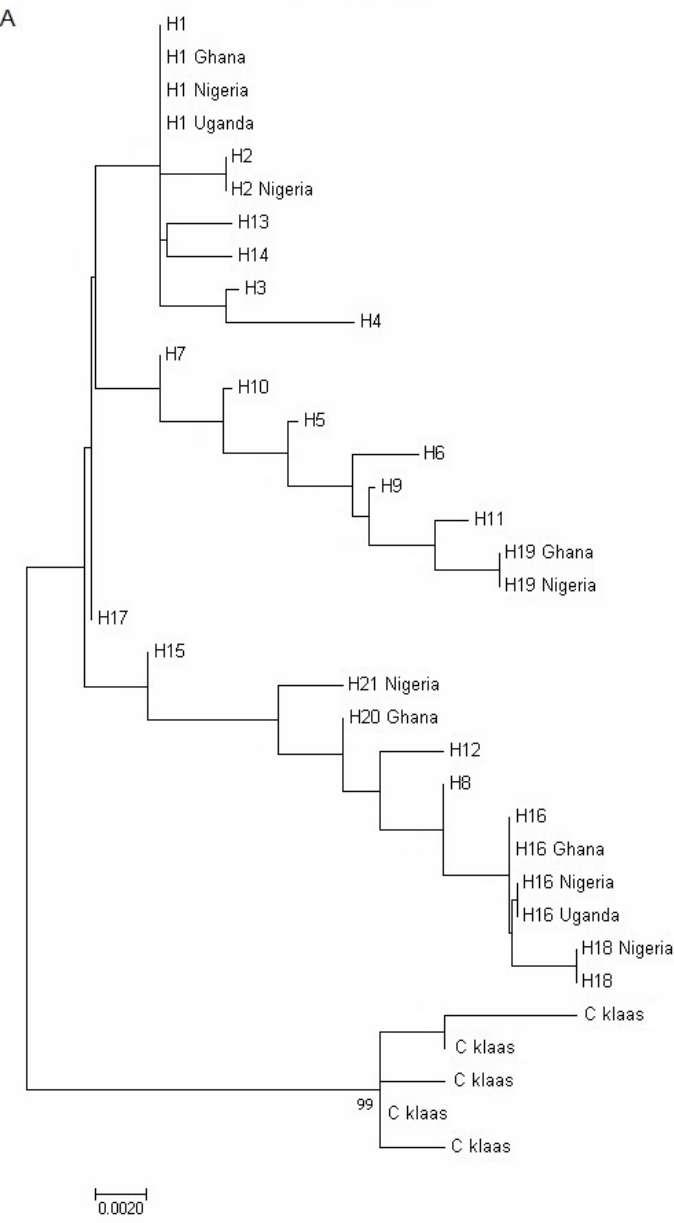

B.

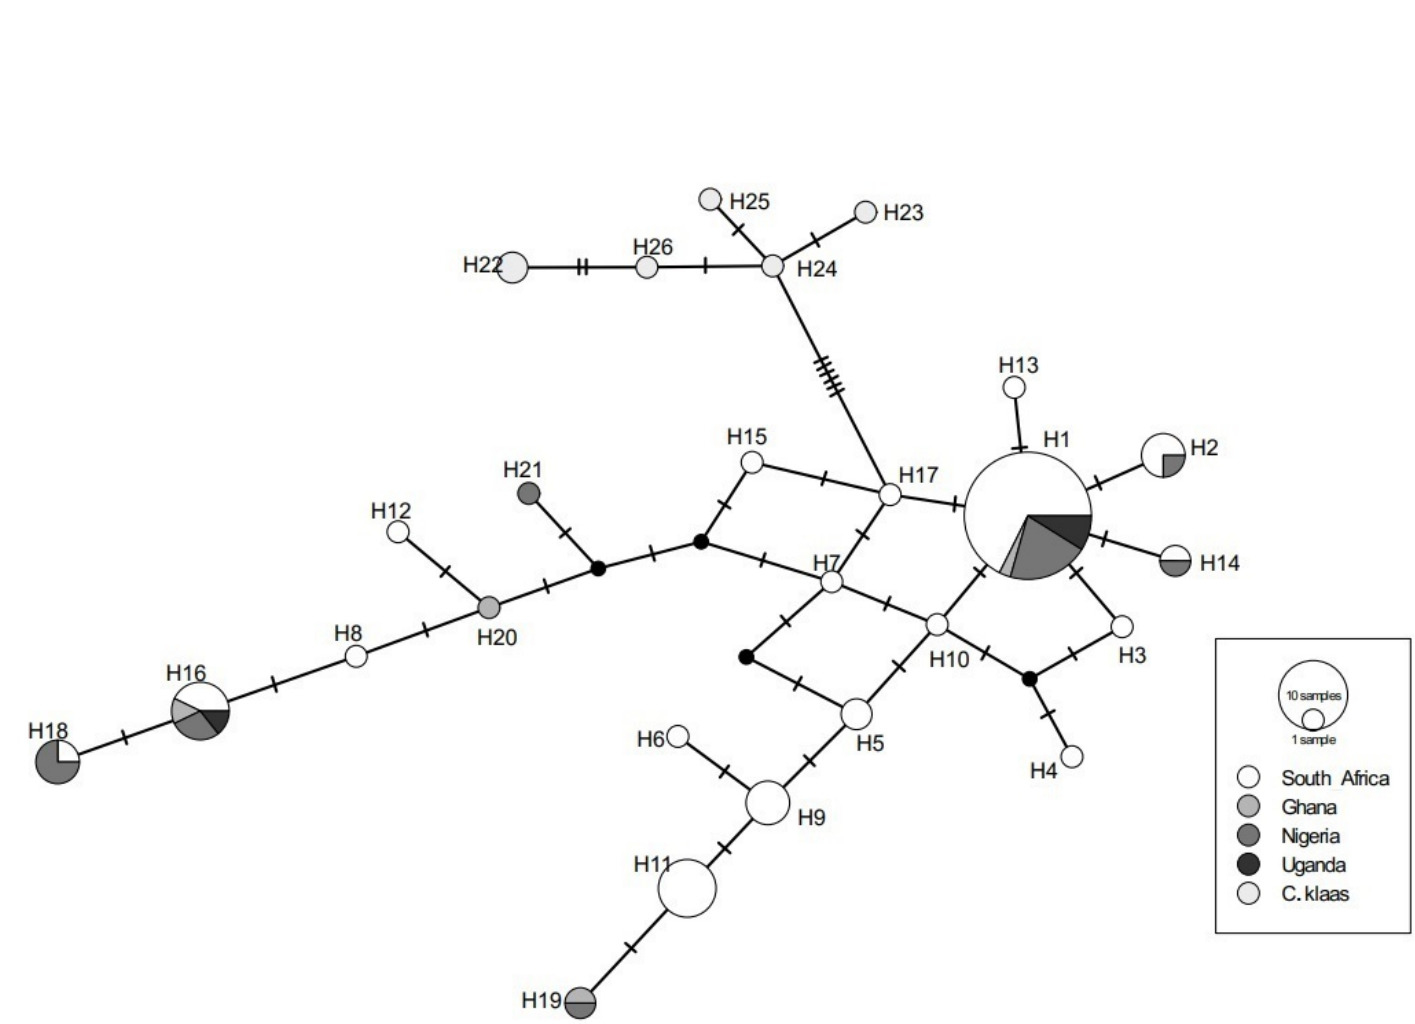

Supplement: Supplementary file 7 [file 1]
